# Supplementary material
Source: PubMed Central journal article supplement (PMC7006892)
Supplement: NIHMS1551045-supplement-Appendix.pdf [file NIHMS1551045-supplement-Appendix.pdf]

**SIPS investigators.**

Alberta Children's Hospital, Canada – Adam Kirton

Akron Children's Hospital, US – Abdalla Abdalla

Aristotle University of Thessaloniki, Greece – Dimitrios Zafeiriou

Cleveland Clinic Children's Hospital, US – Neil Friedman

Children's Central Hospital, Tbilisi, Georgia – Nana Tatishvili

Children's Clinic of Tartu University Hospital, Estonia – Anneli Kolk

Children's Hospital Colorado, US – Jennifer Armstrong

Children's Hospital of Philadelphia, US – Rebecca Ichord

Seattle Children's Hospital, US – Catherine Amlie-Lefond

The Hospital for Sick Children, Canada – Gabrielle deVeber

Mother and Child Health Care Institute, Serbia – Gordana Kovacevic

Pontificia Universidad Catolica de Chile, Chile – Marta Hernandez Chavez

Royal Children's Hospital Melbourne, Australia – Mark Mackay

Hôpital Robert Debré, France – Luigi Titomanlio

St. Louis Children's Hospital, US – Kristin Guilliams

Stanford University, US – Jorina Elbers

University of California San Francisco, US –Christine Fox

Primary Children's Medical Center Utah, US – Susan Benedict

University of Texas Southwestern Medical Center, US – Michael Dowling

Vanderbilt University Medical Center, US – Lori Jordan

West Virginia University, US – Paola Pergami
